# Supplementary material for: The Impact of Cognitive Impairment and Comorbid Depression on Disability, Health Care Utilization, and Costs
Source: Atypon-hosted journal article supplement (doi:10.1176/appi.ps.201400511), 2015-06-15
Supplement: appi.ps.201400511.ds001.pdf [file appi.ps.201400511.ds001.pdf]

**Online supplement.** Sample characteristics by baseline depression and cognitive impairment status

| <b>Baseline characteristics</b>     | <b>All</b>                 | <b>No depression or<br/>Cognitive impairment</b> | <b>Depression alone</b>    | <b>Cognitive<br/>impairment alone</b> | <b>Depression plus<br/>cognitive impairment</b> |
|-------------------------------------|----------------------------|--------------------------------------------------|----------------------------|---------------------------------------|-------------------------------------------------|
| Age in years                        | 65.28 (64.95, 65.61)       | 63.68 (63.35, 64.01)                             | 64.58 (64.00, 65.15)       | 72.35 (71.76, 72.94)                  | 71.54 (70.78, 72.29)                            |
| Sex (%)                             |                            |                                                  |                            |                                       |                                                 |
| Female                              | 57.20 (56.43, 57.96)       | 55.06 (54.25, 55.87)                             | 65.38 (63.19, 67.51)       | 53.09 (50.64, 55.53)                  | 64.88 (62.37, 67.31)                            |
| Male                                | 42.80 (42.04, 43.57)       | 44.94 (44.13, 45.75)                             | 34.62 (32.49, 36.81)       | 46.91 (44.47, 49.36)                  | 35.12 (32.69, 37.63)                            |
| Race/ethnicity (%)                  |                            |                                                  |                            |                                       |                                                 |
| White, Non-Hispanic                 | 83.29 (80.89, 85.45)       | 88.13 (86.48, 89.60)                             | 80.43 (77.41, 83.13)       | 71.01 (66.98, 74.74)                  | 62.06 (55.48, 68.21)                            |
| African American, non-Hispanic      | 8.92 (7.83, 10.14)         | 6.09 (5.40, 6.87)                                | 9.18 (8.01, 10.51)         | 18.81 (15.80, 22.24)                  | 20.37 (16.81, 24.47)                            |
| Other race/multi-race, non-Hispanic | 1.52 (1.04, 2.20)          | 1.40 (1.02, 1.93)                                | 1.80 (1.05, 3.07)          | 1.20 (0.71, 2.04)                     | 2.44 (1.15, 5.12)                               |
| Hispanic                            | 6.27 (4.67, 8.38)          | 4.37 (3.39, 5.63)                                | 8.59 (6.11, 11.94)         | 8.98 (6.42, 12.42)                    | 15.13 (10.40, 21.49)                            |
| Education attainment (%)            |                            |                                                  |                            |                                       |                                                 |
| Less than high school               | 23.21 (21.71, 24.78)       | 14.02 (12.96, 15.16)                             | 27.75 (25.50, 30.12)       | 49.42 (46.36, 52.49)                  | 61.04 (57.60, 64.36)                            |
| High school                         | 36.24 (35.19, 37.30)       | 37.13 (36.08, 38.20)                             | 39.52 (37.25, 41.84)       | 31.67 (29.18, 34.28)                  | 26.58 (23.91, 29.42)                            |
| Some college                        | 20.82 (20.01, 21.66)       | 24.01 (23.00, 25.04)                             | 19.22 (17.63, 20.92)       | 11.86 (10.07, 13.91)                  | 7.59 (6.17, 9.31)                               |
| College graduate and higher         | 19.73 (18.19, 21.36)       | 24.84 (23.03, 26.74)                             | 13.51 (11.41, 15.92)       | 7.05 (5.99, 8.27)                     | 4.79 (3.50, 6.53)                               |
| Marital status (%)                  |                            |                                                  |                            |                                       |                                                 |
| Married/partnered                   | 64.69 (63.39, 65.96)       | 71.48 (70.06, 72.85)                             | 54.39 (51.81, 56.95)       | 53.56 (50.68, 56.41)                  | 40.53 (37.55, 43.59)                            |
| Divorced/separated/widowed          | 31.71 (30.55, 32.89)       | 25.26 (24.10, 26.47)                             | 41.75 (39.13, 44.41)       | 42.09 (39.37, 44.86)                  | 31.71 (30.55, 32.89)                            |
| Never married                       | 3.60 (3.34, 4.00)          | 3.26 (2.84, 3.74)                                | 3.86 (3.07, 4.84)          | 4.35 (3.52, 5.37)                     | 3.60 (3.24, 4.00)                               |
| Household net worth (in 1998 \$)    | 315549<br>(288388, 342711) | 380071<br>(342644, 417499)                       | 224905<br>(201618, 248192) | 173946<br>(150085, 197807)            | 127427<br>(85029, 169824)                       |
| Current smoker (%)                  | 17.46 (16.41, 18.56)       | 16.51 (15.34, 17.75)                             | 22.52 (20.82, 24.31)       | 14.16 (12.28, 16.27)                  | 19.68 (17.20, 22.43)                            |
| Body weight status                  |                            |                                                  |                            |                                       |                                                 |
| Underweight (BMI < 18.5)            | 1.89 (1.63, 2.18)          | 1.39 (1.14, 1.70)                                | 2.44 (1.86, 3.19)          | 2.63 (2.00, 3.45)                     | 4.28 (3.19, 5.72)                               |
| Normal weight (18.5 ≤ BMI < 25)     | 35.44 (34.45, 36.46)       | 35.76 (34.54, 37.00)                             | 31.75 (29.79, 33.78)       | 38.31 (36.04, 40.62)                  | 36.83 (34.39, 39.34)                            |
| Overweight (25 ≤ BMI < 30)          | 39.20 (38.49, 39.91)       | 40.34 (39.46, 41.22)                             | 37.08 (34.98, 39.22)       | 37.83 (35.41, 40.31)                  | 35.28 (32.71, 37.94)                            |
| Class I obesity (30 ≤ BMI < 35)     | 16.51 (15.87, 17.17)       | 16.28 (15.56, 17.02)                             | 18.31 (16.64, 20.11)       | 16.31 (14.87, 17.87)                  | 14.64 (12.60, 16.95)                            |
| Class II and III obesity (BMI ≥ 35) | 6.96 (6.44, 7.51)          | 6.23 (5.72, 6.77)                                | 10.42 (9.14, 11.86)        | 4.93 (3.84, 6.30)                     | 8.97 (7.19, 11.14)                              |
| Chronic disease diagnosis (%)       |                            |                                                  |                            |                                       |                                                 |
| Hypertension                        | 41.17 (40.19, 42.16)       | 37.47 (36.32, 38.63)                             | 45.02 (43.24, 46.81)       | 47.84 (45.38, 50.32)                  | 57.80 (54.36, 61.17)                            |
| Diabetes                            | 11.93 (11.35, 12.54)       | 9.55 (8.97, 10.16)                               | 15.57 (14.34, 16.89)       | 15.38 (13.82, 17.08)                  | 21.05 (18.61, 23.71)                            |
| Stroke                              | 5.88 (5.47, 6.32)          | 3.89 (3.54, 4.28)                                | 7.81 (6.84, 8.91)          | 9.87 (8.47, 11.47)                    | 14.47 (12.46, 16.74)                            |
| Heart disease                       | 18.62 (17.85, 19.42)       | 14.84 (14.06, 15.66)                             | 24.01 (22.30, 25.80)       | 24.78 (23.06, 26.58)                  | 32.98 (30.44, 35.62)                            |
| Cancer                              | 9.75 (9.25, 10.26)         | 9.27 (8.65, 9.94)                                | 11.11 (10.01, 12.32)       | 9.89 (8.53, 11.43)                    | 10.83 (8.79, 13.28)                             |
| Chronic lung disease                | 6.52 (6.00, 7.09)          | 4.71 (4.24, 5.22)                                | 11.48 (10.14, 12.96)       | 6.83 (5.57, 8.36)                     | 11.81 (9.78, 14.18)                             |
| Arthritis                           | 46.70 (45.57, 47.83)       | 41.51 (40.31, 42.73)                             | 58.11 (56.05, 60.14)       | 50.59 (48.03, 53.15)                  | 63.74 (60.79, 66.59)                            |

|                              |                      |                      |                      |                      |                      |
|------------------------------|----------------------|----------------------|----------------------|----------------------|----------------------|
| Health insurance             |                      |                      |                      |                      |                      |
| Any private insurance        | 73.7 (72.04, 75.30)  | 80.68 (79.26, 82.02) | 67.47 (65.24, 69.63) | 58.19 (55.32, 61.00) | 45.21 (41.43, 49.05) |
| Public only                  | 20.68 (19.37, 22.06) | 14.33 (13.23, 15.50) | 23.98 (22.37, 25.68) | 36.90 (34.36, 39.50) | 49.25 (45.39, 53.11) |
| Uninsured                    | 5.61 (5.07, 6.21)    | 5.00 (4.45, 5.61)    | 8.54 (7.20, 10.11)   | 4.92 (3.84, 6.27)    | 5.54 (4.30, 7.11)    |
| Sample size                  | 18,315               | 11,620               | 3,047                | 2,261                | 1,387                |
| Proportion in population (%) |                      | 66.09 (64.88, 67.28) | 16.53 (15.92, 17.15) | 10.82 (10.15, 11.53) | 6.56 (5.96, 7.22)    |

*Note.* HRS sampling design was incorporated in estimating the population proportions (for dichotomous variables) and means (for continuous variables) with standard errors. 95% confidence intervals (CI) were presented in parentheses.
